# Supplementary material for: Heterologous expression of flax PHOSPHOLIPID:DIACYLGLYCEROL CHOLINEPHOSPHOTRANSFERASE (PDCT) increases polyunsaturated fatty acid content in yeast and Arabidopsis seeds
Source: PubMed Central journal article supplement (PMC4486708; doi:10.1186/s12896-015-0156-6), 2015-06-30
Supplement: 12896_2015_156_MOESM1_ESM.pdf [file 12896_2015_156_MOESM1_ESM.pdf]

## Additional Files

```

LuPDCT1          -----MS-AAPTTTVAATAIPLKRKKTDA-----
LuPDCT2          -----MS-ATPTAAVAATAIPLKRKKTDA-----
AtROD1           -----MS-----AAAETDVSLRRRSNSLNGNHTNGVA----- IDGTLDNRRRVDG
RcROD1           -----MKSTVPPTTTTTTTTTLYKRKKDINLTSVNDVS-----DMVS-----NKN-----
Brassica         -----MSTNTVVPLRRRS---NGYHTNGVA-----FNG-----
Brachypodium     -----MPPPSLAAAQDQVAANAA--G-----NGIDARRRAGK GK-----KVHP
Gossypium        -----MKTAEATAATTTVLSRQYKRSPKS-----NG-----KVNGT
Glycin           -----MNGGA-----EASV-----NHRRRHQ
Hordeum          -----MPPASLTAADRASAANG--L-----AGPETRRRAGK GK-----KVHP
Medicago        -----MNGGA-----ASSSGDATVLKRRTHT
Oryza            -----MPPPPPSLTANTASSMGNAE--AVVVLPAANGARRRADKVV-----HPAP
Picea            -----MSCRRRSSEDNGGETDMIYVDRRTKQCLGNLFCICSQEIQ
Populus          -----ME-----NKN-----
Sorghum          -----MPPPSLTAATAATTT-----TRRRKD-----HP
Helianthus       MTVEKLHHRTPVPTTTT-----ILQPPNNIS-----
Zea              -----MPPPSLTAAGTTTT-----TTRRRNDRAA-----KVHQ
  
```

```

LuPDCT1          -AA-KTQKNNQG-----NEDEQEAI VESVAPFTKWRRRDAMNAVREHWLPVILGGALLF
LuPDCT2          -AA-KTQKNNQG-----NEDEQEAI VESVAPFTKWRRRDAMNAVREHWLPVILGGALLF
AtROD1           TNTHMDSAKKTD-NGYANGVGGGG-WRSKASFTTWTARDIVVYVRYHWI PCMFAAGLLF
RcROD1           -F--ANGNVNGG-----GGYTA FNRFDP SFMKWTT HDVVNVVK FHWLP CVFGLGLLF
Brassica         ----MDNIVKKTDCY TNGNGNGGVERSKASFLT WTRDAVYVARYHWI PCFFAVGVLF
Brachypodium     LPDAG---TTMGD-GVGMGG---GESRKGRPEWM--TPAGAAGVLRHPLP VVVFACGLLL
Gossypium        AA--KKTGVNHG-----NGGDISNGKASF MKWTLDDVVYVAKYHRLPCFFAAWFLF
Glycin           AA--SANGVKIAN-GAM---AKPSS TLCYDASF MKWTVADAVHVATHHWMPCLFALGLLF
Hordeum          LPPDG---AAMGD-GGERLA---GG--RRPADWL--SPSGVAGILRRHPLPALFACGLLL
Medicago        TN--QTNHNSQKN-PMPKNSSSLSCLSYSSASFLKWTISDVVHVATHHWMPCLFACGLLF
Oryza            MPDRAAGGAMERE-GGGVGGGGEVGGW--RRPEWC--SAAGVAGVLRRH PAAA AFGCGLLL
Picea            RKLRDLMGANGNVVHQEKSPFLGDTAVYPSFMGWSMTYLI GTARFHPLPVLLVGCGLLF
Populus          -K--QTNGITTD-----GAANGFYGDPSFLKWTLRD VVNVAKHHLWPCFLGFGLLF
Sorghum          APG---GGAGAKE-MGAAA--SAAEGWARRPEWC--SAAGVAGVLRRH PAPA LFGCGLLL
Helianthus       ----INKINLKNTHNHETTTTFSHRWSF DAFCLRW MVADV FGLLYHPVPCFFGVSLLF
Zea              VLG---EGAGTEE-MGAV-----ADGWT-RPEWC--SAAGVAGVLRRH PAPA LFGCGLLL
  
```

\* \* \*

```

LuPDCT1          FMWVEYTLRMVPTSSQPFDLGFVATRALHRL LSSSPELNSVLAALNTV FVGMQTSY I LW T
LuPDCT2          FMWVEYTLRMVPTSSQPFDLGFVATRALHRL LSSSPELNSVLAALNTV FVGMQTSY I LW T
AtROD1           FMGVEYTLQMI PARSEPF DLGFVVTRSLNRV LASSPDLNTVLAALNTV FVGMQTT Y I VWT
RcROD1           FMAVEYTLRMVPASSPFDLGFVTRHLHL LSSWPALNTLLAFLNTV FVLMQ TAY I LW T
Brassica         FMGVEYTLQMPAKSEPF D IGFVATRSLNRV LASSPDLNTLLAALNTV FVAMQTT Y I VWT
Brachypodium     FMGVEYTI PMVPHAAPPLD LGF LATAAMHDG IAARPWLN SLLAALNTV FVAMQ TAY I LW A
Gossypium        FIYVEYTLRMVPDSSPFDLGFVVT RSLHRALASWPELNSLLAALNTV FVAMQ SVY I IGT
Glycin           FMAVEYTLMLVPPSSPFDLGF IAT RSLHALLESSPNLNTL FAGLNTV FVGMQTSY I LW T
Hordeum          FMGVEYTI PMIPAAAPPLD LGFHATAAMHAG IAARPWLN SLLAALNTV FVAMQ AAY I LW A
Medicago        FMAVEYTLFMVSSSPFDLGFVTRSLHRVLESSPQLNNVLAALNTV FVLMQ TSY I LW T
Oryza            FMAVEYTI PMVPPAAPVDLGF AATAALHAG IAARPWLN SLLAALNTV FVAMQ AAY I LW A
Picea            FMAVEYTLVMVPAGSQPYDVGFVWTQSL HDLL LERPALNTVLAAMNTV FVGMQTF Y I LW T
Populus          FMAVEYTLRMVPSSSPFDLGFVTRRLHGL LSSWPELNTSLAGLNTV FVGMQ TAY I LW T
Sorghum          FMAVEYTI PMVRPDSPPDLGF IATRNMHAAVAATP WLN SLLAALNTV I VAMQ AAY I LW A
Helianthus       FMGVEYTLWMVPSSSPFDI G FVATAWLHRVLAASPVLNTVLAGLNTV FVGMQTT Y I LW T
Zea              FMAVEYTI PMVKPDAPPLD LGF LATAAGMHA A I ARPWLN SLLAALNTV FVAMQ AAY I LW A
  
```

\* \* \* \* \* \* \* \* \* \* \* \* \* \* \* \* \* \* \* \* \* \* \* \* \* \* \* \* \* \* \* \* \* \*

```

LuPDCT1          FVVEGRGRPTISALFMFTCRGILGYSTQLPLPEGYLGSGVDFPVGNVSFFLFFSGHVAGS
LuPDCT2          FVVEGRGRPTISALFMFTCRGILGYSTQLPLPEGYLGSGVDFPVGNVSFFLFFSGHVAGS
AtROD1           WLVEGRARATIAALFMFTCRGILGYSTQLPLPQDFLGSVDFPVGNVSFFLFFSGHVAGS
RcROD1           WLI EGRPRATISALFMFTCRGILGYSTQLPLPEGFLGSVDFPVGNVSFFLFFSGHVAGS
Brassica         WLM EGRPRATISACFMFTCRGILGYSTQLPLPQDFLGSVDFPVGNVSFFLFFSGHVAGS
Brachypodium     ILAEQRPRAAIATLMMFTCRGLLGCSTQLPLPAEFLSGMDFPVGNVSFFLFFSGHVAGA
Gossypium        WVVEGRPRATISALFMFTCRGILGYSTQLPLPQEFVSGMDFPVGNVSFFLFFSGHVAGS
  
```



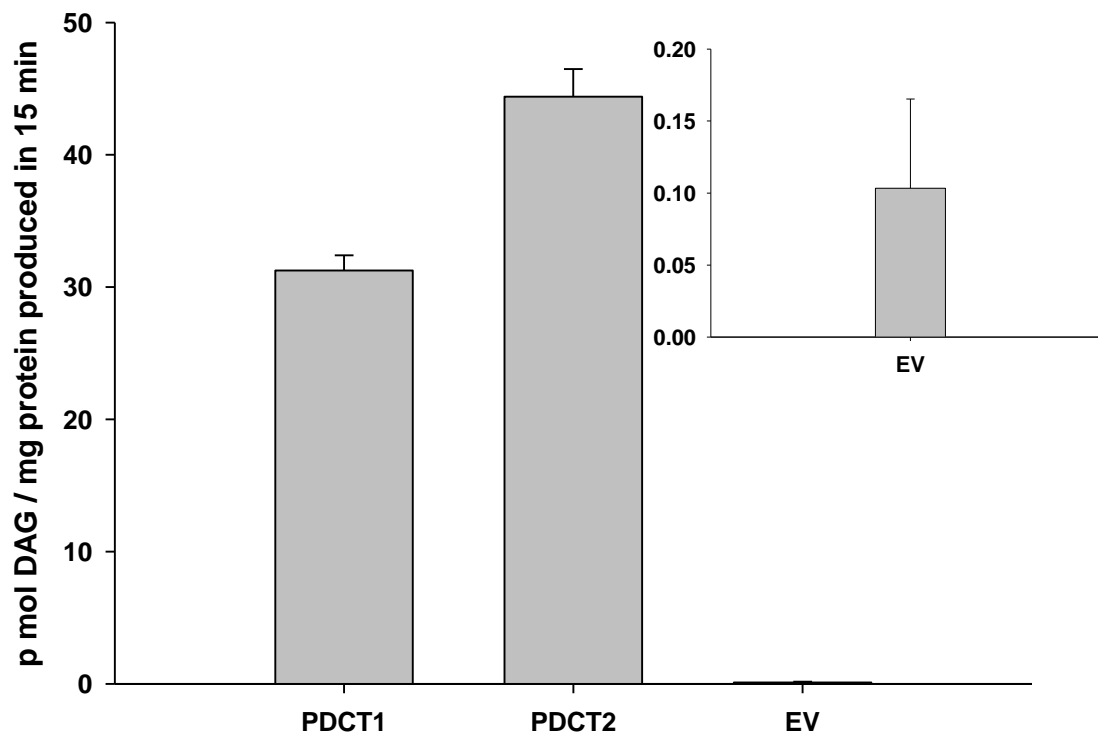

Figure S2: Production of radio-labeled diacylglycerol (DAG) catalyzed by LuPDCT1 or LuPDCT2 after 15 min incubation. Data shown represent means  $\pm$  SE, with sample numbers of  $n=3$

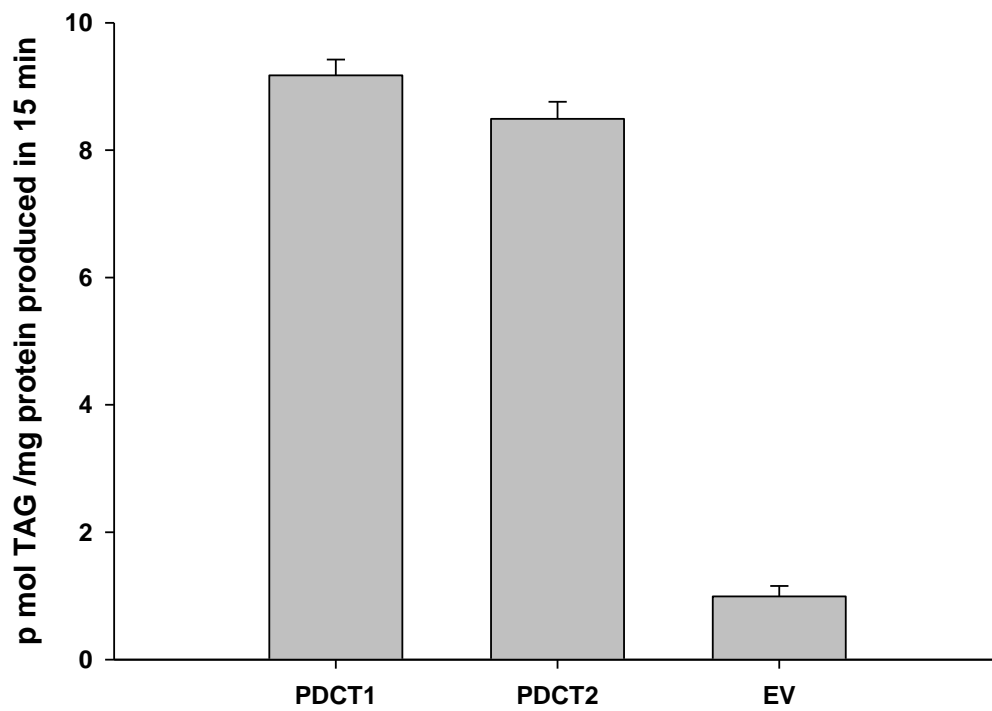

Figure S3: Production of radio-labeled triacylglycerol (TAG) during the assay of PDCT in the direction of radio-labeled diacylglycerol (DAG) formation. The incubation time was 15 min. Data shown represent means  $\pm$  SE, with sample numbers of  $n=3$

S Table 1: Proportions of C18:1, C18:2 and C18:3 in non-transformed wild-type (WT) and *rod1* mutant Arabidopsis seeds, as well as T<sub>2</sub> *rod1* seeds bearing empty vector, *LuPDCT1* (P1) or *LuPDCT2* expression cassettes. Results represent the average ( $\pm$ SE) of triplicate measurements of 10 independent transgenic lines for *PDCT* genes and five independent transgenic lines for empty vector (EV) transformed lines. For WT and *rod1* mutant lines, n=3.

| Line               | Fatty acid composition (mol %)                 |                                   |                                   |
|--------------------|------------------------------------------------|-----------------------------------|-----------------------------------|
|                    | C18:1                                          | C18:2                             | C18:3                             |
| WT                 | 16.48 $\pm$ 0.66                               | 28.11 $\pm$ 0.33                  | 16.33 $\pm$ 0.11                  |
| <i>rod1</i>        | 32.87 $\pm$ 0.65                               | 14.81 $\pm$ 0.47                  | 13.99 $\pm$ 0.48                  |
| <i>rod1</i> +EV    | 37.74 $\pm$ 0.32<br>(36.75-38.53) <sup>a</sup> | 13.21 $\pm$ 0.31<br>(12.26-13.45) | 12.36 $\pm$ 0.49<br>(10.67-13.37) |
| <i>rod1</i> +PDCT1 | 20.62 $\pm$ 1.00<br>(15.40-24.29)              | 25.79 $\pm$ 0.28<br>(24.55-27.44) | 15.29 $\pm$ 0.75<br>(12.86-19.03) |
| <i>rod1</i> +PDCT2 | 21.38 $\pm$ 0.52<br>(18.20-22.77)              | 26.04 $\pm$ 0.46<br>(23.62-28.02) | 15.00 $\pm$ 0.60<br>(12.76-17.80) |

<sup>a</sup> Percent molar range among independent transformants.

S Table 2: Fatty acid composition of transgenic *A. thaliana* T<sub>2</sub> seeds expressing *LuPDCT1* and *LuPDCT2*. Results represent the average ( $\pm$ SE) of triplicate measurements of 10 independent transgenic lines for *PDCT* genes and five independent transgenic lines for empty vector (EV) transformed lines. For wild type (WT) lines n=5.

| Construct | Fatty acid composition (mol %)               |                                |                                   |                                   |                                   |                                |                                   |                                |                                |                                   |
|-----------|----------------------------------------------|--------------------------------|-----------------------------------|-----------------------------------|-----------------------------------|--------------------------------|-----------------------------------|--------------------------------|--------------------------------|-----------------------------------|
|           | C16:0                                        | C18:0                          | C18:1                             | C18:2                             | C18:3                             | C20:0                          | C20:1                             | C20:2                          | C22:1                          | 18:2+18:3                         |
| PDCT1     | 9.77 $\pm$ 0.13<br>(9.14-10.27) <sup>a</sup> | 3.77 $\pm$ 0.05<br>(3.50-3.92) | 12.08 $\pm$ 0.28<br>(9.99-12.99)  | 29.28 $\pm$ 0.12<br>(28.66-29.95) | 20.87 $\pm$ 0.36<br>(19.52-22.83) | 1.76 $\pm$ 0.02<br>(1.67-1.90) | 18.03 $\pm$ 0.23<br>(17.21-19.44) | 2.83 $\pm$ 0.04<br>(2.67-3.12) | 1.61 $\pm$ 0.05<br>(1.40-1.93) | 50.15 $\pm$ 0.27<br>(49.08-51.49) |
| PDCT2     | 9.61 $\pm$ 0.18<br>(8.82-10.55)              | 3.57 $\pm$ 0.10<br>(3.10-4.24) | 12.04 $\pm$ 0.30<br>(9.73-13.28)  | 29.11 $\pm$ 0.34<br>(27.78-31.64) | 22.47 $\pm$ 0.40<br>(20.09-24.24) | 1.68 $\pm$ 0.09<br>(1.24-2.35) | 17.18 $\pm$ 0.53<br>(13.51-19.35) | 2.81 $\pm$ 0.10<br>(2.30-3.20) | 1.52 $\pm$ 0.12<br>(1.02-2.29) | 51.59 $\pm$ 0.61<br>(49.35-55.84) |
| EV        | 8.71 $\pm$ 0.15<br>(8.44-9.28)               | 4.71 $\pm$ 0.27<br>(4.00-5.68) | 17.90 $\pm$ 0.21<br>(17.17-18.39) | 26.43 $\pm$ 0.36<br>(25.82-27.81) | 16.67 $\pm$ 0.28<br>(15.67-17.36) | 2.75 $\pm$ 0.18<br>(2.28-3.16) | 18.83 $\pm$ 0.45<br>(17.29-19.04) | 2.36 $\pm$ 0.06<br>(2.31-2.57) | 1.82 $\pm$ 0.03<br>(1.74-1.92) | 43.10 $\pm$ 0.57<br>(41.76-43.10) |
| WT        | 8.94 $\pm$ 0.13<br>(8.54-9.16)               | 4.24 $\pm$ 0.18<br>(3.76-4.65) | 18.77 $\pm$ 0.19<br>(18.26-19.31) | 26.90 $\pm$ 0.36<br>(25.69-27.79) | 16.31 $\pm$ 0.21<br>(15.86-16.98) | 2.25 $\pm$ 0.13<br>(1.81-2.60) | 18.35 $\pm$ 0.09<br>(18.09-18.64) | 2.34 $\pm$ 0.09<br>(2.09-2.54) | 1.78 $\pm$ 0.17<br>(1.46-2.38) | 43.21 $\pm$ 0.53<br>(41.56-43.62) |

<sup>a</sup> Percent molar range among independent transformants.

S Table 3: Primers and probes used for qRT-PCR assay.

| Gene         | Forward primer         | Reverse primer        | Probe               |
|--------------|------------------------|-----------------------|---------------------|
| <i>PDCT1</i> | TGCGATGAATGCGGTTAGG    | CAACAGGGCACCTCCCAATA  | AGCATTGGTTGCCTGTC   |
| <i>PDCT2</i> | ACACCATTGATTTGGCCGCC   | GGCGGTCTTGGTTTGGAGG   | CTGCTCTTTGACTCACTTG |
| <i>GAPDH</i> | GACATCGTCTCCAACGCTAGCT | CATTGATAACCTTGGCCAAAG | ACCACTAACTGCCTTGC   |
| <i>Ubi2</i>  | CGGACACCATCGACAATGT    | TCCGGCGGGATTCCTT      | AAGGCCAAGATCCAG     |
